# Supplementary material for: Thin Films of Metal-Organic Framework Interfaces Obtained by Laser Evaporation
Source: MDPI journal article supplement (doi:10.3390/nano11061367), 2021-05-21
Supplement: s1 [file s1]

## Supplementary Materials

# Thin films of metal-organic frameworks interfaces obtained by laser evaporation

Olivia L. Rose<sup>1</sup>, Anca Bonciu<sup>2,£,3</sup>, Valentina Marascu<sup>2,4</sup>, Andreea Matei<sup>2</sup>, Qian Liu<sup>1</sup>, Laurentiu Rusen<sup>2</sup>, Valentina Dinca<sup>2,£\*\*</sup> and Cerasela Zoica Dinu<sup>1,\*</sup>

<sup>1</sup> Department of Chemical and Biomedical Engineering, West Virginia University, Morgantown, WV 26506 USA; cerasela-zoica.dinu@mail.wvu.edu

<sup>2</sup> National Institute for Laser, Plasma and Radiation Physics, Magurele, Ilfov, RO-077125, Romania

<sup>£</sup> IN2 - FOTOPLASMAT center, Magurele, RO-077125 Ilfov, Romania

<sup>3</sup> Faculty of Physics, University of Bucharest, Magurele, RO-077125 Ilfov, Romania; valentina.dinca@inflpr.ro

<sup>4</sup> Université Paris-Saclay, CEA, INRAE, DMTS, SCBM, F-91191 Gif-sur-Yvette, France

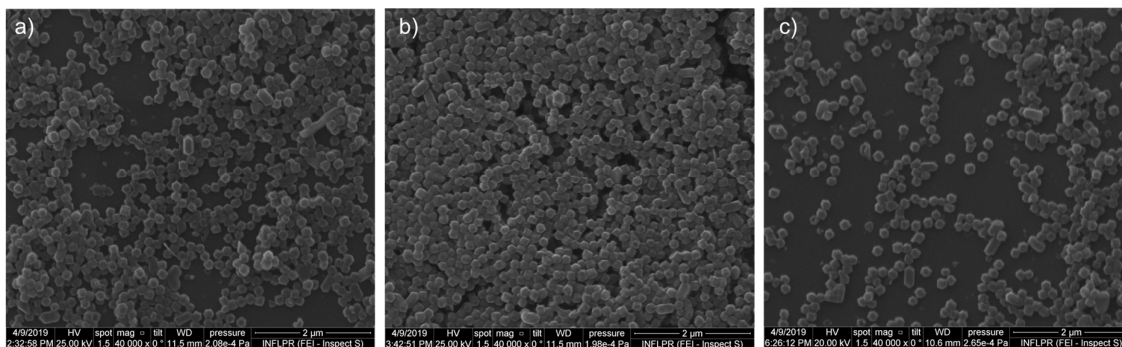

**Figure 1.** SEM images of MAPLE samples deposited at different fluencies, i.e., 0.3 (a); 0.6 (b) and 0.8 J·cm<sup>-2</sup> (c) respectively.

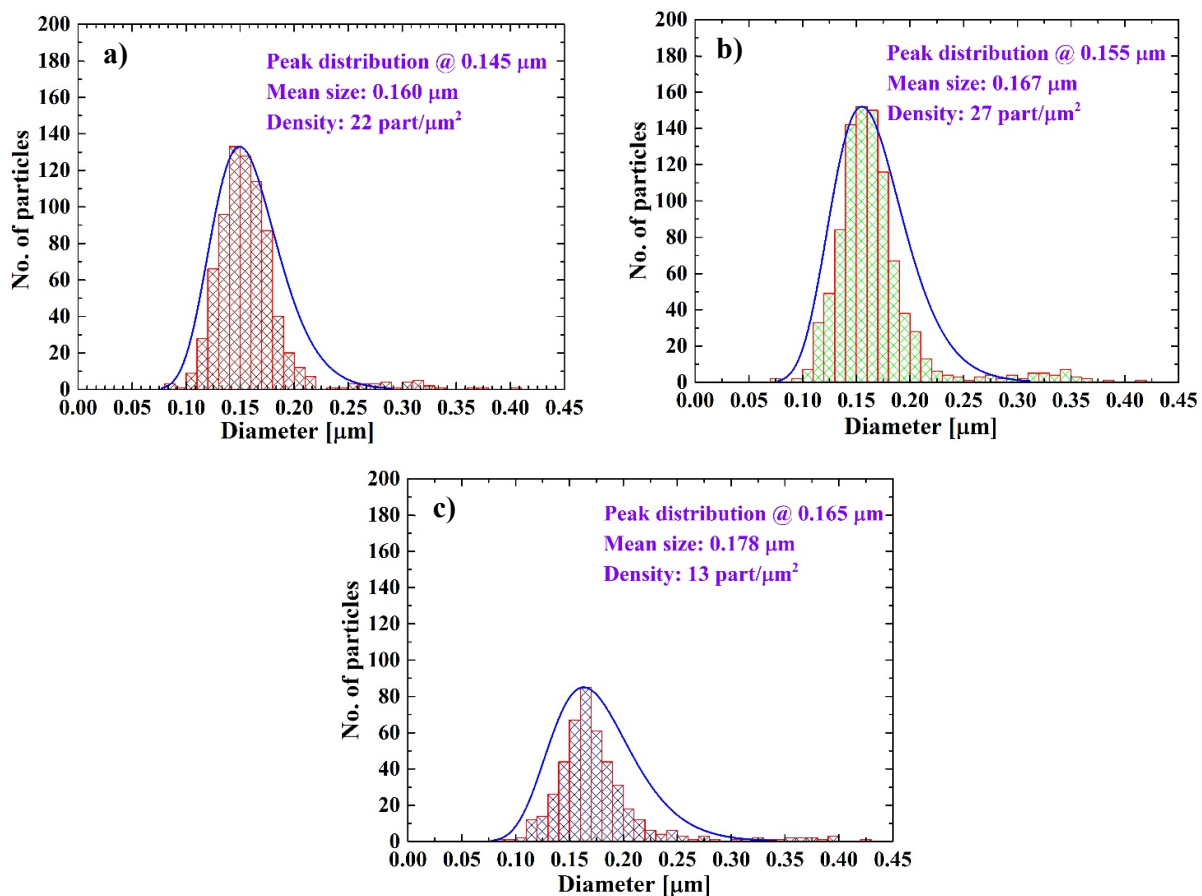

**Figure S2:** Histogram size analysis of MAPLE deposited samples at different laser fluencies (a for 0.3 J·cm<sup>-2</sup>, b for 0.6 J·cm<sup>-2</sup> and c for 0.8 J·cm<sup>-2</sup> respectively)

**Table S1.** Element average weight percent of MAPLE films obtained at different fluencies.

| Element<br>Average<br>Weight<br>percent (%) | Control<br>ZIF8 | ZIF8<br>(0.300 J·cm <sup>-2</sup> ) | ZIF8<br>(0.450 J·cm <sup>-2</sup> ) | ZIF8<br>(0.600 J·cm <sup>-2</sup> ) | ZIF8<br>(0.800 J·cm <sup>-2</sup> ) |
|---------------------------------------------|-----------------|-------------------------------------|-------------------------------------|-------------------------------------|-------------------------------------|
| C                                           | 44.74 ± 3.04    | 16.07 ± 12.76                       | 47.27 ± 0.99                        | 46.70 ± 2.12                        | 32.18 ± 8.52                        |
| N                                           | 19.97 ± 2.12    | 3.65 ± 4.04                         | 29.75 ± 3.01                        | 27.59 ± 5.01                        | 10.73 ± 5.00                        |
| O                                           | 1.44 ± 1.59     | 0.57 ± 0.48                         | 1.81 ± 0.53                         | 1.94 ± 1.05                         | 0.47 ± 0.40                         |
| Zn                                          | 5.73 ± 0.69     | 1.52 ± 0.86                         | 7.43 ± 1.65                         | 6.69 ± 2.25                         | 1.97 ± 0.66                         |

**Table S2.** Atomic ratios for ZIF-8 control and MAPLE deposited ZIF-8 films.

The Zn doublet Zn 2p<sub>3/2</sub> and Zn 2p<sub>1/2</sub> can be identified at 1022.8 eV and 1046 eV, with the characteristic split spin-orbit components (23.2 eV).

|                        | ZIF8<br>Control | ZIF8<br>(0.300 J·cm <sup>-2</sup> ) | ZIF8<br>(0.450 J·cm <sup>-2</sup> ) | ZIF8<br>(0.600 J·cm <sup>-2</sup> ) | ZIF8<br>(0.800 J·cm <sup>-2</sup> ) |
|------------------------|-----------------|-------------------------------------|-------------------------------------|-------------------------------------|-------------------------------------|
|                        | Atomic %        | Atomic %                            | Atomic %                            | Atomic %                            | Atomic %                            |
| Zn2p <sub>3</sub>      | 6.52            | 9.17                                | 7.73                                | 8.7                                 | 7.42                                |
| C1s                    | 53.91           | 47.82                               | 48.44                               | 44.88                               | 49.37                               |
| O1s                    | 19.03           | 29.39                               | 26.78                               | 27.75                               | 30.21                               |
| N1s                    | 20              | 13.92                               | 17.05                               | 18.67                               | 13                                  |
| Zn2p <sub>3</sub> /N1s | 0.317           | 0.673                               | 0.453                               | 0.466                               | 0.570                               |

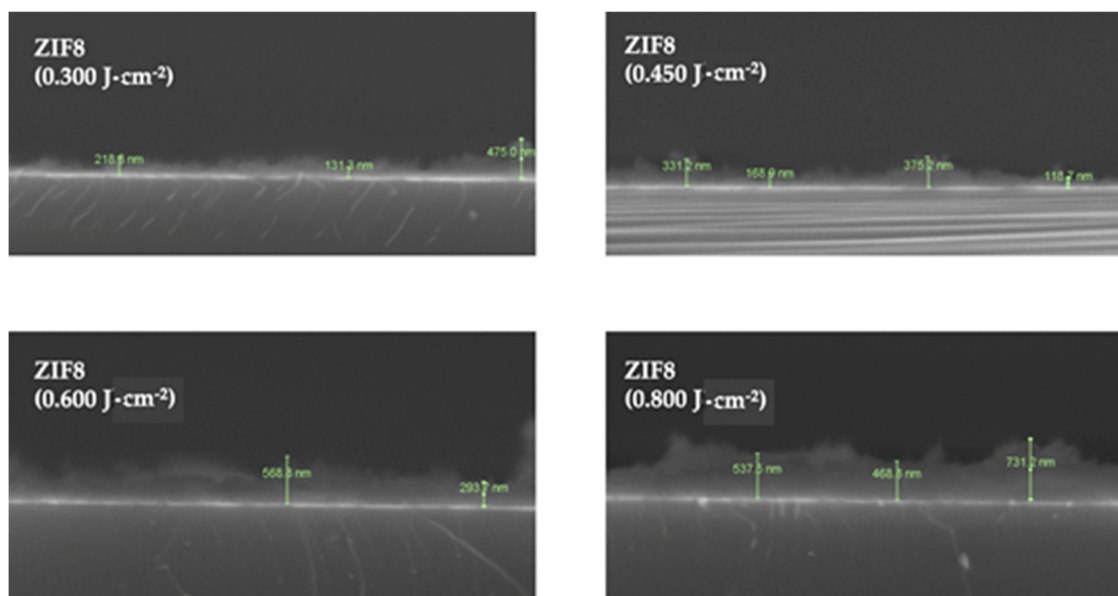

**Figure S3:** Cross-section and thin film thickness dependence on the frequency being used.

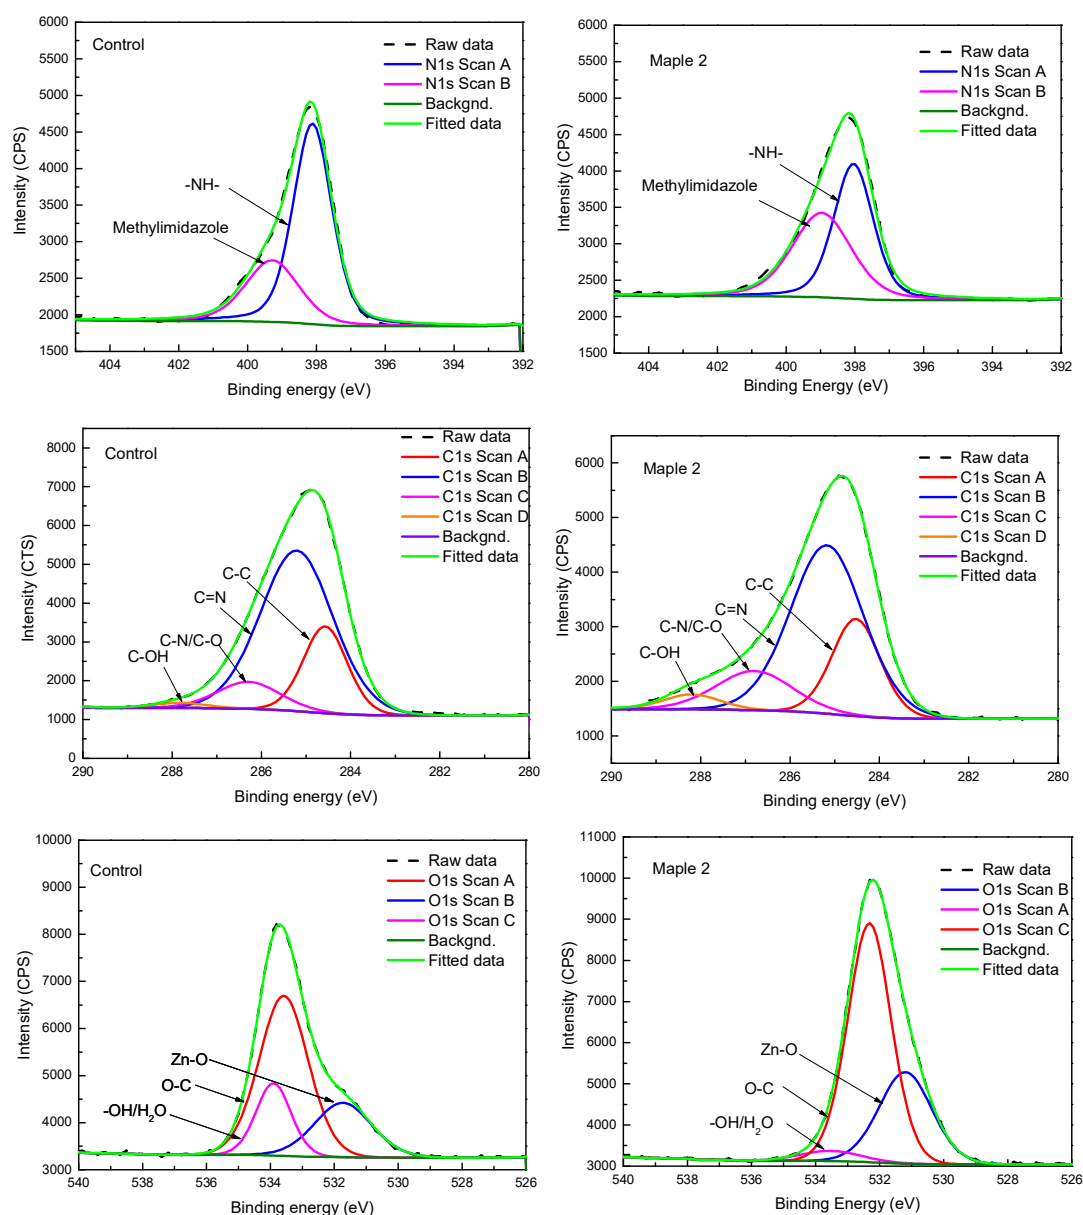

**Figure S4.** C1s, O1s and N1s high-resolution XPS spectra of ZIF-8 control and MAPLE deposited ZIF-8 film obtained at the 0.45 Jcm<sup>-2</sup> fluency.

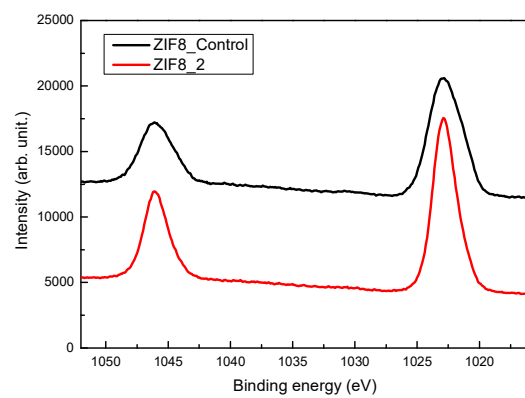

**Figure S5:** Zn2p high-resolution XPS spectra of ZIF-8 control and MAPLE deposited ZIF-8 thin film at  $0.450 \text{ J}\cdot\text{cm}^{-2}$ .
